# Supplementary material for: A Systemic Inflammation Response Score for Prognostic Prediction of Breast Cancer Patients Undergoing Surgery
Source: MDPI journal article supplement (doi:10.3390/jpm11050413), 2021-05-14
Supplement: s1 [file s1]

**Supplemental Table S1. Akaike information criterion (AIC) for the prognostic model.**

| Model | Prognostic signature combination | AIC    |
|-------|----------------------------------|--------|
| 1     | ALB + NMR + NLR + LMR            | 1908.2 |
| 2     | ALB + NLR + LMR                  | 1910.5 |
| 3     | ALB + NMR + NLR                  | 1913.5 |
| 4     | ALB + NMR + LMR                  | 1916.5 |
| 5     | NMR + NLR + LMR                  | 1916.7 |

**Supplemental Table S2. Regression coefficient of each model based on multivariate Cox regression analysis.**

| Prognostic factors | Regression coefficient based on multivariate Cox regression |         |         |         |         |
|--------------------|-------------------------------------------------------------|---------|---------|---------|---------|
|                    | Model 1                                                     | Model 2 | Model 3 | Model 4 | Model 5 |
| ALB                | -0.579                                                      | -0.555  | -0.593  | -0.607  | NA      |
| NMR                | 0.496                                                       | NA      | 0.422   | 0.631   | 0.447   |
| NLR                | 0.680                                                       | 0.775   | 0.773   | NA      | 0.718   |
| LMR                | -0.980                                                      | -0.901  | NA      | -1.119  | -0.101  |
